# Supplementary material for: Tetraalkylammonium oleate and linoleate based ionic liquids: promising extractants for metal salts
Source: Royal Society of Chemistry journal article supplement (doi:10.1039/c2gc36458a), 2012-11-01
Supplement: c2gc36458a.pdf [file c2gc36458a.pdf]

This report was created by ACD/NMR Processor Academic Edition. For more information go to [www.acdlabs.com/nmrproc/](http://www.acdlabs.com/nmrproc/)

1/18/2012 1:30:45 PM

|                                                                |                                        |
|----------------------------------------------------------------|----------------------------------------|
| <b>Formula</b> C <sub>43</sub> H <sub>85</sub> NO <sub>2</sub> | <b>FW</b> 648.1405 (279.4381+368.7024) |
|----------------------------------------------------------------|----------------------------------------|

|                                                                       |                                      |                                 |                                      |
|-----------------------------------------------------------------------|--------------------------------------|---------------------------------|--------------------------------------|
| <b>Acquisition Time (sec)</b> 1.9980                                  | <b>Comment</b> Std Proton parameters | <b>Date</b> Jan 16 2012         | <b>Date Stamp</b> Jan 16 2012        |
| <b>File Name</b> \\wetsus04\users\...dpar\Project\NMR\DPAR030.fid\fid | <b>Frequency (MHz)</b> 400.16        | <b>Nucleus</b> 1H               | <b>Number of Transients</b> 16       |
| <b>Original Points Count</b> 12791                                    | <b>Points Count</b> 16384            | <b>Pulse Sequence</b> s2pul     | <b>Receiver Gain</b> 12.00           |
| <b>Spectrum Offset (Hz)</b> 2400.9629                                 | <b>Spectrum Type</b> STANDARD        | <b>Sweep Width (Hz)</b> 6402.05 | <b>Temperature (degree C)</b> 25.000 |
| <b>Solvent</b> CHLOROFORM-d                                           |                                      |                                 |                                      |

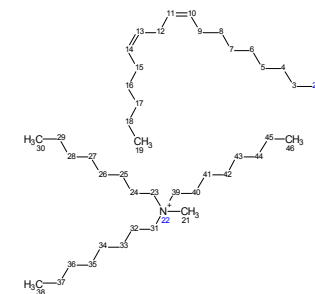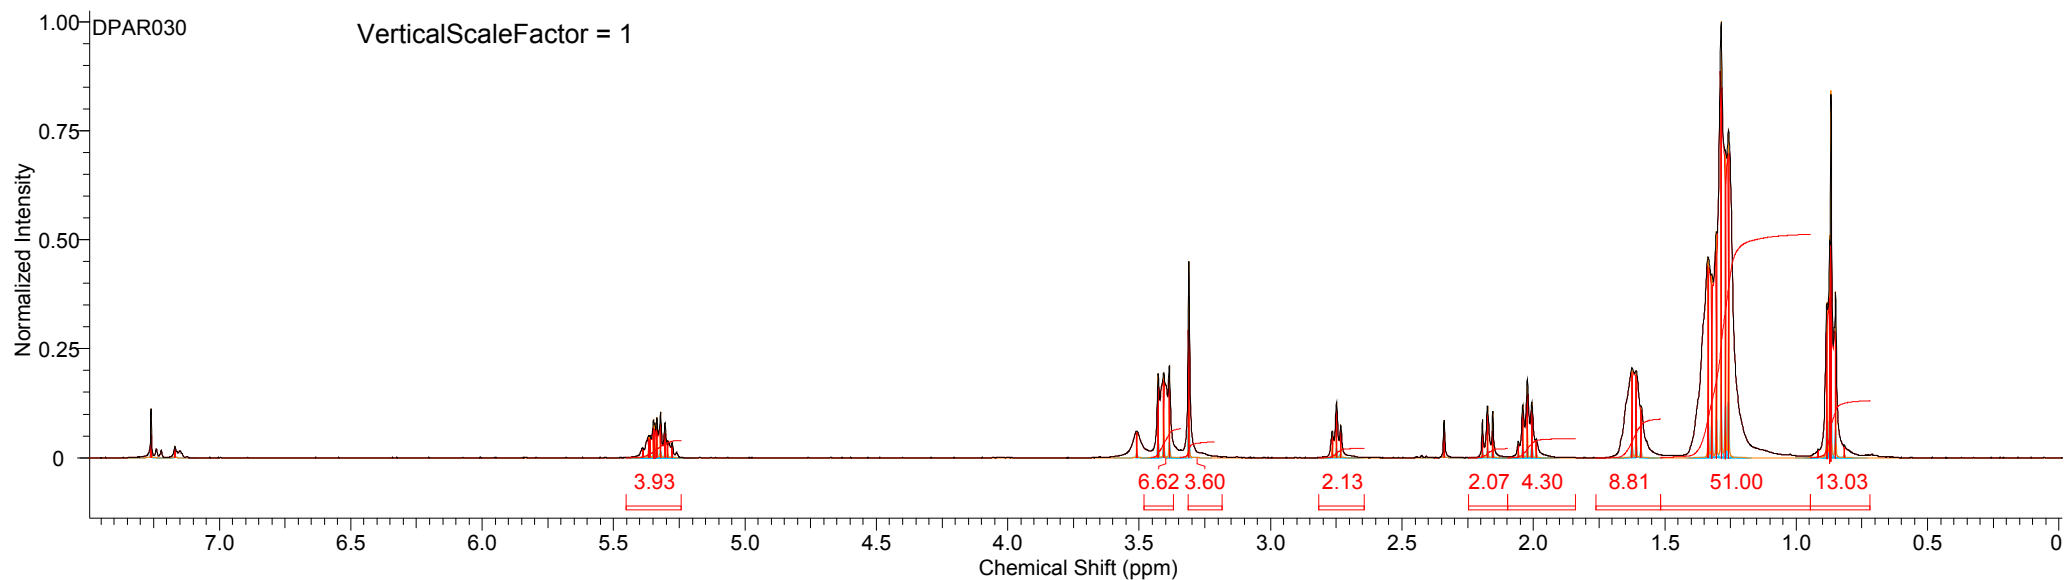

This report was created by ACD/NMR Processor Academic Edition. For more information go to [www.acdlabs.com/nmrproc/](http://www.acdlabs.com/nmrproc/)

| No. | (ppm) | (Hz)   | *(ppm) | *(Hz)   | Height | *Height | *FWHH | *Area      | *LF  | *Function     | No. | Atom | Exp. Shift (ppm) |
|-----|-------|--------|--------|---------|--------|---------|-------|------------|------|---------------|-----|------|------------------|
| 1   | 0.82  | 326.9  | 0.82   | 326.93  | 0.0284 | 0.0284  | 0.70  | 1234593.75 | 0.50 | Gauss+Lorentz | 1   | 38   | 0.87             |
| 2   | 0.85  | 340.2  | 0.85   | 340.22  | 0.3801 | 0.3801  | 0.70  | 16538923.0 | 0.50 | Gauss+Lorentz | 2   | 30   | 0.87             |
| 3   | 0.87  | 347.3  | 0.87   | 347.25  | 0.8343 | 0.8343  | 0.70  | 36323504.0 | 0.50 | Gauss+Lorentz | 3   | 46   | 0.87             |
| 4   | 0.87  | 349.2  | 0.87   | 349.20  | 0.4957 | 0.4957  | 0.70  | 21587290.0 | 0.50 | Gauss+Lorentz | 4   | 19   | 0.87             |
| 5   | 0.88  | 353.5  | 0.88   | 353.50  | 0.3538 | 0.3538  | 0.70  | 15413098.0 | 0.50 | Gauss+Lorentz | 5   | 37   | 1.29             |
| 6   | 0.92  | 366.8  | 0.92   | 366.79  | 0.0200 | 0.0200  | 0.70  | 875111.25  | 0.50 | Gauss+Lorentz | 6   | 35   | 1.29             |
| 7   | 1.26  | 503.2  | 1.26   | 503.17  | 0.7518 | 0.7518  | 0.70  | 32731550.0 | 0.50 | Gauss+Lorentz | 7   | 36   | 1.29             |
| 8   | 1.27  | 507.9  | 1.27   | 507.86  | 0.7040 | 0.7040  | 0.70  | 30667178.0 | 0.50 | Gauss+Lorentz | 8   | 34   | 1.29             |
| 9   | 1.29  | 514.5  | 1.29   | 514.50  | 1.0000 | 1.0000  | 0.70  | 43606176.0 | 0.50 | Gauss+Lorentz | 9   | 33   | 1.29             |
| 10  | 1.30  | 521.5  | 1.30   | 521.54  | 0.5175 | 0.5175  | 0.70  | 22590406.0 | 0.50 | Gauss+Lorentz | 10  | 29   | 1.29             |
| 11  | 1.32  | 528.6  | 1.32   | 528.57  | 0.4211 | 0.4211  | 0.70  | 18407952.0 | 0.50 | Gauss+Lorentz | 11  | 28   | 1.29             |
| 12  | 1.33  | 534.0  | 1.33   | 534.04  | 0.4600 | 0.4600  | 0.70  | 20126612.0 | 0.50 | Gauss+Lorentz | 12  | 27   | 1.29             |
| 13  | 1.59  | 636.4  | 1.59   | 636.42  | 0.1187 | 0.1187  | 0.70  | 5167063.00 | 0.50 | Gauss+Lorentz | 13  | 26   | 1.29             |
| 14  | 1.61  | 643.8  | 1.61   | 643.85  | 0.1999 | 0.1999  | 0.70  | 8696673.00 | 0.50 | Gauss+Lorentz | 14  | 25   | 1.29             |
| 15  | 1.62  | 650.1  | 1.62   | 650.10  | 0.2061 | 0.2061  | 0.70  | 8963280.00 | 0.50 | Gauss+Lorentz | 15  | 43   | 1.29             |
| 16  | 1.99  | 795.9  | 1.99   | 795.86  | 0.0430 | 0.0430  | 0.70  | 1871412.13 | 0.50 | Gauss+Lorentz | 16  | 42   | 1.29             |
| 17  | 2.01  | 802.5  | 2.01   | 802.50  | 0.1273 | 0.1273  | 0.70  | 5539554.50 | 0.50 | Gauss+Lorentz | 17  | 45   | 1.29             |
| 18  | 2.02  | 809.5  | 2.02   | 809.54  | 0.1800 | 0.1800  | 0.70  | 7829333.00 | 0.50 | Gauss+Lorentz | 18  | 44   | 1.29             |
| 19  | 2.04  | 816.6  | 2.04   | 816.57  | 0.1217 | 0.1217  | 0.70  | 5293112.00 | 0.50 | Gauss+Lorentz | 19  | 41   | 1.29             |
| 20  | 2.06  | 823.2  | 2.06   | 823.21  | 0.0377 | 0.0377  | 0.70  | 1639476.75 | 0.50 | Gauss+Lorentz | 20  | 5    | 1.29             |
| 21  | 2.15  | 862.3  | 2.15   | 862.29  | 0.1063 | 0.1063  | 0.70  | 4653591.00 | 0.50 | Gauss+Lorentz | 21  | 6    | 1.29             |
| 22  | 2.17  | 870.1  | 2.17   | 870.11  | 0.1188 | 0.1188  | 0.70  | 5209242.00 | 0.50 | Gauss+Lorentz | 22  | 7    | 1.29             |
| 23  | 2.19  | 877.9  | 2.19   | 877.92  | 0.0873 | 0.0873  | 0.70  | 3831050.50 | 0.50 | Gauss+Lorentz | 23  | 8    | 1.29             |
| 24  | 2.34  | 936.5  | 2.34   | 936.54  | 0.0853 | 0.0853  | 0.70  | 3723558.00 | 0.50 | Gauss+Lorentz | 24  | 18   | 1.29             |
| 25  | 2.73  | 1093.6 | 2.73   | 1093.63 | 0.0750 | 0.0750  | 0.70  | 3272518.50 | 0.50 | Gauss+Lorentz | 25  | 17   | 1.29             |
| 26  | 2.75  | 1100.3 | 2.75   | 1100.27 | 0.1266 | 0.1266  | 0.70  | 5521235.50 | 0.50 | Gauss+Lorentz | 26  | 16   | 1.29             |
| 27  | 2.77  | 1106.5 | 2.77   | 1106.52 | 0.0611 | 0.0611  | 0.70  | 2663481.75 | 0.50 | Gauss+Lorentz | 27  | 32   | 1.62             |
| 28  | 3.31  | 1325.0 | 3.31   | 1324.97 | 0.4498 | 0.4498  | 0.70  | 19633960.0 | 0.50 | Gauss+Lorentz | 28  | 24   | 1.62             |
| 29  | 3.39  | 1354.7 | 3.39   | 1354.67 | 0.2110 | 0.2110  | 0.70  | 9253262.00 | 0.50 | Gauss+Lorentz | 29  | 40   | 1.62             |
| 30  | 3.41  | 1363.3 | 3.41   | 1363.26 | 0.1951 | 0.1951  | 0.70  | 8558798.00 | 0.50 | Gauss+Lorentz | 30  | 4    | 1.62             |
| 31  | 3.43  | 1371.9 | 3.43   | 1371.86 | 0.1930 | 0.1930  | 0.70  | 8451698.00 | 0.50 | Gauss+Lorentz | 31  | 9    | 2.02             |
| 32  | 3.51  | 1404.3 | 3.51   | 1404.29 | 0.0618 | 0.0618  | 0.70  | 2703457.50 | 0.50 | Gauss+Lorentz | 32  | 15   | 2.02             |
| 33  | 5.28  | 2112.0 | 5.28   | 2111.99 | 0.0348 | 0.0348  | 0.70  | 1515067.63 | 0.50 | Gauss+Lorentz | 33  | 3    | 2.17             |
| 34  | 5.29  | 2118.6 | 5.29   | 2118.63 | 0.0397 | 0.0397  | 0.70  | 1731765.50 | 0.50 | Gauss+Lorentz | 34  | 12   | 2.75             |
| 35  | 5.30  | 2122.5 | 5.30   | 2122.54 | 0.0797 | 0.0797  | 0.70  | 3482056.50 | 0.50 | Gauss+Lorentz | 35  | 21   | 3.31             |
| 36  | 5.32  | 2129.6 | 5.32   | 2129.57 | 0.1051 | 0.1051  | 0.70  | 4595945.00 | 0.50 | Gauss+Lorentz | 36  | 23   | 3.41             |
| 37  | 5.34  | 2135.0 | 5.34   | 2135.04 | 0.0923 | 0.0923  | 0.70  | 4037641.50 | 0.50 | Gauss+Lorentz | 37  | 39   | 3.41             |
| 38  | 5.34  | 2138.2 | 5.34   | 2138.17 | 0.0781 | 0.0781  | 0.70  | 3419218.25 | 0.50 | Gauss+Lorentz | 38  | 31   | 3.41             |
| 39  | 5.35  | 2140.1 | 5.35   | 2140.12 | 0.0867 | 0.0867  | 0.70  | 3798361.75 | 0.50 | Gauss+Lorentz | 39  | 10   | 5.34             |
| 40  | 5.36  | 2145.6 | 5.36   | 2145.59 | 0.0504 | 0.0504  | 0.70  | 2211435.50 | 0.50 | Gauss+Lorentz | 40  | 11   | 5.34             |
| 41  | 5.37  | 2147.5 | 5.37   | 2147.55 | 0.0511 | 0.0511  | 0.70  | 2238452.50 | 0.50 | Gauss+Lorentz | 41  | 13   | 5.34             |
| 42  | 5.39  | 2156.1 | 5.39   | 2156.14 | 0.0223 | 0.0223  | 0.70  | 975037.88  | 0.50 | Gauss+Lorentz | 42  | 14   | 5.34             |
| 43  | 7.17  | 2868.5 | 7.17   | 2868.52 | 0.0256 | 0.0256  | 0.70  | 1121951.63 | 0.50 | Gauss+Lorentz |     |      |                  |
| 44  | 7.26  | 2905.3 | 7.26   | 2905.26 | 0.1122 | 0.1122  | 0.70  | 4901268.00 | 0.50 | Gauss+Lorentz |     |      |                  |
