# Supplementary material for: Tetraalkylammonium oleate and linoleate based ionic liquids: promising extractants for metal salts
Source: Royal Society of Chemistry journal article supplement (doi:10.1039/c2gc36458a), 2012-11-01
Supplement: c2gc36458a_2.pdf [file c2gc36458a_2.pdf]

This report was created by ACD/NMR Processor Academic Edition. For more information go to [www.acdlabs.com/nmrproc/](http://www.acdlabs.com/nmrproc/)

1/18/2012 11:54:27 AM

|                                                                |                                        |
|----------------------------------------------------------------|----------------------------------------|
| <b>Formula</b> C <sub>43</sub> H <sub>87</sub> NO <sub>2</sub> | <b>FW</b> 650.1564 (281.4540+368.7024) |
|----------------------------------------------------------------|----------------------------------------|

|                                                                      |                                      |                                 |                                      |
|----------------------------------------------------------------------|--------------------------------------|---------------------------------|--------------------------------------|
| <b>Acquisition Time (sec)</b> 1.9980                                 | <b>Comment</b> Std Proton parameters | <b>Date</b> Jan 16 2012         | <b>Date Stamp</b> Jan 16 2012        |
| <b>File Name</b> \\wetsus04\users\j.dpar\Project\NMR\DPAR028.fid\fid | <b>Frequency (MHz)</b> 400.16        | <b>Nucleus</b> 1H               | <b>Number of Transients</b> 16       |
| <b>Original Points Count</b> 12791                                   | <b>Points Count</b> 16384            | <b>Pulse Sequence</b> s2pul     | <b>Receiver Gain</b> 12.00           |
| <b>Spectrum Offset (Hz)</b> 2400.9629                                | <b>Spectrum Type</b> STANDARD        | <b>Sweep Width (Hz)</b> 6402.05 | <b>Temperature (degree C)</b> 25.000 |
|                                                                      |                                      | <b>Solvent</b> CHLOROFORM-d     |                                      |

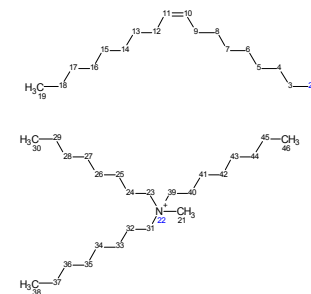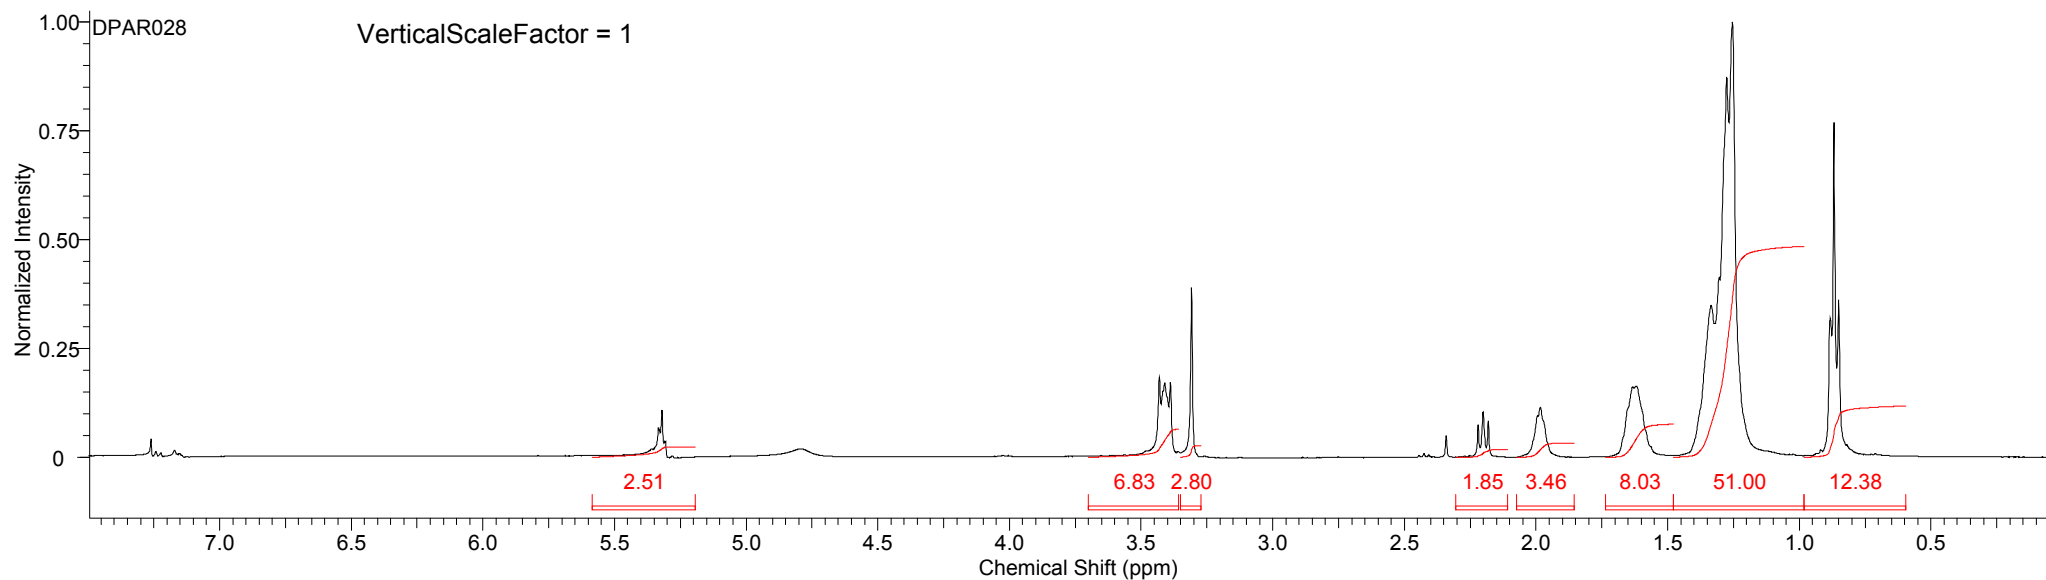

This report was created by ACD/NMR Processor Academic Edition. For more information go to [www.acdlabs.com/nmrproc/](http://www.acdlabs.com/nmrproc/)

| No. | Atom | Exp. Shift (ppm) | No. | (ppm) | (Hz)   | Height |
|-----|------|------------------|-----|-------|--------|--------|
| 1   | 38   | 0.87             | 1   | 0.82  | 328.1  | 0.0289 |
| 2   | 46   | 0.87             | 2   | 0.85  | 340.6  | 0.3622 |
| 3   | 30   | 0.87             | 3   | 0.87  | 347.6  | 0.7687 |
| 4   | 19   | 0.87             | 4   | 0.88  | 352.7  | 0.3195 |
| 5   | 37   | 1.25             | 5   | 1.25  | 501.6  | 1.0000 |
| 6   | 36   | 1.25             | 6   | 1.28  | 510.6  | 0.8720 |
| 7   | 35   | 1.25             | 7   | 1.30  | 521.9  | 0.4130 |
| 8   | 34   | 1.25             | 8   | 1.33  | 534.0  | 0.3493 |
| 9   | 33   | 1.25             | 9   | 1.62  | 648.5  | 0.1635 |
| 10  | 28   | 1.25             | 10  | 1.63  | 653.6  | 0.1613 |
| 11  | 29   | 1.25             | 11  | 1.98  | 793.9  | 0.1148 |
| 12  | 27   | 1.25             | 12  | 1.99  | 798.2  | 0.0953 |
| 13  | 26   | 1.25             | 13  | 2.18  | 872.8  | 0.0842 |
| 14  | 25   | 1.25             | 14  | 2.20  | 880.7  | 0.1044 |
| 15  | 45   | 1.25             | 15  | 2.22  | 888.5  | 0.0743 |
| 16  | 44   | 1.25             | 16  | 2.34  | 936.9  | 0.0501 |
| 17  | 43   | 1.25             | 17  | 3.31  | 1323.8 | 0.3901 |
| 18  | 42   | 1.25             | 18  | 3.39  | 1355.8 | 0.1723 |
| 19  | 41   | 1.25             | 19  | 3.41  | 1364.4 | 0.1711 |
| 20  | 5    | 1.25             | 20  | 3.43  | 1372.6 | 0.1841 |
| 21  | 6    | 1.25             | 21  | 5.31  | 2123.3 | 0.0363 |
| 22  | 7    | 1.25             | 22  | 5.31  | 2124.5 | 0.0369 |
| 23  | 8    | 1.25             | 23  | 5.32  | 2128.8 | 0.1088 |
| 24  | 13   | 1.25             | 24  | 5.33  | 2133.9 | 0.0682 |
| 25  | 14   | 1.25             | 25  | 7.26  | 2905.3 | 0.0432 |
| 26  | 15   | 1.25             |     |       |        |        |
| 27  | 16   | 1.25             |     |       |        |        |
| 28  | 17   | 1.25             |     |       |        |        |
| 29  | 18   | 1.25             |     |       |        |        |
| 30  | 32   | 1.62             |     |       |        |        |
| 31  | 24   | 1.62             |     |       |        |        |
| 32  | 40   | 1.62             |     |       |        |        |
| 33  | 4    | 1.62             |     |       |        |        |
| 34  | 9    | 1.98             |     |       |        |        |
| 35  | 12   | 1.98             |     |       |        |        |
| 36  | 3    | 2.20             |     |       |        |        |
| 37  | 21   | 3.31             |     |       |        |        |
| 38  | 31   | 3.43             |     |       |        |        |
| 39  | 23   | 3.43             |     |       |        |        |
| 40  | 39   | 3.43             |     |       |        |        |
| 41  | 10   | 5.32             |     |       |        |        |
| 42  | 11   | 5.32             |     |       |        |        |
