# Supplementary material for: Tetraalkylammonium oleate and linoleate based ionic liquids: promising extractants for metal salts
Source: Royal Society of Chemistry journal article supplement (doi:10.1039/c2gc36458a), 2012-11-01
Supplement: c2gc36458a_4.pdf [file c2gc36458a_4.pdf]

This report was created by ACD/NMR Processor Academic Edition. For more information go to [www.acdlabs.com/nmrproc/](http://www.acdlabs.com/nmrproc/)

1/18/2012 1:42:06 PM

|                                                                |                                        |
|----------------------------------------------------------------|----------------------------------------|
| <b>Formula</b> C <sub>50</sub> H <sub>99</sub> NO <sub>2</sub> | <b>FW</b> 746.3266 (279.4381+466.8885) |
|----------------------------------------------------------------|----------------------------------------|

|                               |                                                     |                      |                       |                         |             |                               |                   |                             |              |
|-------------------------------|-----------------------------------------------------|----------------------|-----------------------|-------------------------|-------------|-------------------------------|-------------------|-----------------------------|--------------|
| <b>Acquisition Time (sec)</b> | 1.9980                                              | <b>Comment</b>       | Std Proton parameters |                         | <b>Date</b> | Jan 16 2012                   | <b>Date Stamp</b> | Jan 16 2012                 |              |
| <b>File Name</b>              | \\wetsus04\users\j.dpar\Project\NMR\DPAR031.fid\fid |                      |                       | <b>Frequency (MHz)</b>  | 400.16      | <b>Nucleus</b>                | 1H                | <b>Number of Transients</b> | 16           |
| <b>Original Points Count</b>  | 12791                                               | <b>Points Count</b>  | 16384                 | <b>Pulse Sequence</b>   | s2pul       | <b>Receiver Gain</b>          | 14.00             | <b>Solvent</b>              | CHLOROFORM-d |
| <b>Spectrum Offset (Hz)</b>   | 2400.9688                                           | <b>Spectrum Type</b> | STANDARD              | <b>Sweep Width (Hz)</b> | 6402.05     | <b>Temperature (degree C)</b> | 25.000            |                             |              |

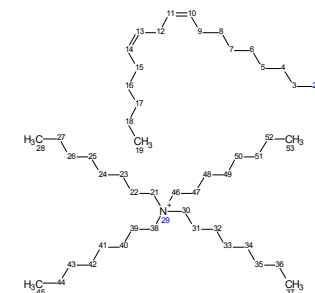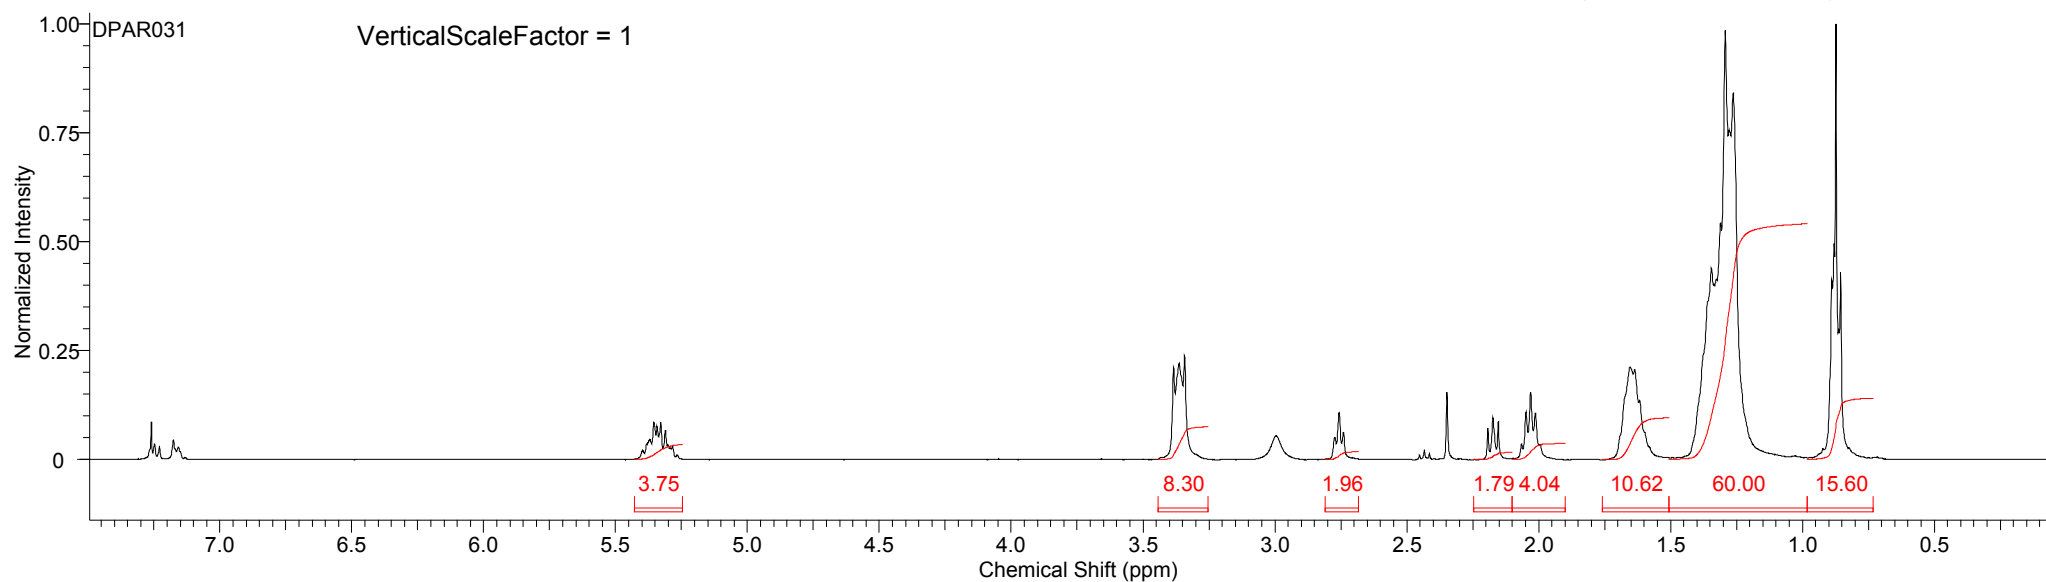

**This report was created by ACD/NMR Processor Academic Edition. For more information go to [www.acdlabs.com/nmrproc/](http://www.acdlabs.com/nmrproc/)**

|     |       |       |        |     |       |       |        |     |       |        |        |     |       |        |        |     |       |        |        |
|-----|-------|-------|--------|-----|-------|-------|--------|-----|-------|--------|--------|-----|-------|--------|--------|-----|-------|--------|--------|
| No. | (ppm) | (Hz)  | Height | No. | (ppm) | (Hz)  | Height | No. | (ppm) | (Hz)   | Height | No. | (ppm) | (Hz)   | Height | No. | (ppm) | (Hz)   | Height |
| 1   | 0.82  | 329.3 | 0.0273 | 12  | 1.33  | 530.9 | 0.4146 | 23  | 2.15  | 861.5  | 0.0874 | 34  | 3.38  | 1354.3 | 0.2125 | 45  | 5.38  | 2153.4 | 0.0360 |
| 2   | 0.86  | 342.2 | 0.4301 | 13  | 1.34  | 534.4 | 0.4010 | 24  | 2.17  | 869.7  | 0.0954 | 35  | 5.28  | 2114.3 | 0.0306 | 46  | 5.40  | 2159.3 | 0.0203 |
| 3   | 0.86  | 345.3 | 0.2985 | 14  | 1.35  | 538.3 | 0.4401 | 25  | 2.19  | 877.5  | 0.0730 | 36  | 5.29  | 2117.9 | 0.0274 | 47  | 7.16  | 2864.2 | 0.0288 |
| 4   | 0.87  | 349.2 | 1.0000 | 15  | 1.62  | 647.0 | 0.1353 | 26  | 2.35  | 939.3  | 0.1553 | 37  | 5.30  | 2121.4 | 0.0336 | 48  | 7.18  | 2871.7 | 0.0448 |
| 5   | 0.88  | 351.9 | 0.4964 | 16  | 1.64  | 654.8 | 0.2068 | 27  | 2.43  | 973.7  | 0.0219 | 38  | 5.31  | 2125.3 | 0.0668 | 49  | 7.23  | 2892.8 | 0.0314 |
| 6   | 0.89  | 355.9 | 0.4136 | 17  | 1.65  | 661.8 | 0.2122 | 28  | 2.74  | 1096.8 | 0.0626 | 39  | 5.33  | 2132.3 | 0.0850 | 50  | 7.25  | 2900.2 | 0.0361 |
| 7   | 0.92  | 369.1 | 0.0251 | 18  | 1.99  | 798.2 | 0.0349 | 29  | 2.76  | 1103.0 | 0.1077 | 40  | 5.34  | 2137.8 | 0.0769 | 51  | 7.26  | 2904.9 | 0.0857 |
| 8   | 1.26  | 505.1 | 0.8406 | 19  | 2.01  | 805.6 | 0.1061 | 30  | 2.77  | 1109.7 | 0.0514 | 41  | 5.35  | 2142.9 | 0.0861 |     |       |        |        |
| 9   | 1.28  | 511.8 | 0.7554 | 20  | 2.03  | 812.7 | 0.1540 | 31  | 3.00  | 1198.8 | 0.0543 | 42  | 5.37  | 2148.3 | 0.0466 |     |       |        |        |
| 10  | 1.29  | 517.2 | 0.9855 | 21  | 2.05  | 819.7 | 0.1098 | 32  | 3.34  | 1337.5 | 0.2391 | 43  | 5.37  | 2149.9 | 0.0441 |     |       |        |        |
| 11  | 1.31  | 524.3 | 0.5425 | 22  | 2.07  | 826.3 | 0.0354 | 33  | 3.36  | 1345.7 | 0.2216 | 44  | 5.38  | 2151.9 | 0.0399 |     |       |        |        |

|     |      |                  |     |      |                  |     |      |                  |     |      |                  |     |      |                  |
|-----|------|------------------|-----|------|------------------|-----|------|------------------|-----|------|------------------|-----|------|------------------|
| No. | Atom | Exp. Shift (ppm) |
| 1   | 45   | 0.87             | 12  | 43   | 1.29             | 23  | 50   | 1.29             | 34  | 39   | 1.64             | 45  | 46   | 3.36             |
| 2   | 37   | 0.87             | 13  | 42   | 1.29             | 24  | 51   | 1.29             | 35  | 31   | 1.64             | 46  | 10   | 5.35             |
| 3   | 28   | 0.87             | 14  | 41   | 1.29             | 25  | 52   | 1.29             | 36  | 47   | 1.64             | 47  | 11   | 5.35             |
| 4   | 53   | 0.87             | 15  | 40   | 1.29             | 26  | 18   | 1.29             | 37  | 4    | 1.64             | 48  | 13   | 5.35             |
| 5   | 19   | 0.87             | 16  | 36   | 1.29             | 27  | 17   | 1.29             | 38  | 9    | 2.03             | 49  | 14   | 5.35             |
| 6   | 27   | 1.29             | 17  | 35   | 1.29             | 28  | 16   | 1.29             | 39  | 15   | 2.03             |     |      |                  |
| 7   | 26   | 1.29             | 18  | 34   | 1.29             | 29  | 8    | 1.29             | 40  | 3    | 2.17             |     |      |                  |
| 8   | 25   | 1.29             | 19  | 33   | 1.29             | 30  | 7    | 1.29             | 41  | 12   | 2.76             |     |      |                  |
| 9   | 24   | 1.29             | 20  | 32   | 1.29             | 31  | 6    | 1.29             | 42  | 38   | 3.36             |     |      |                  |
| 10  | 23   | 1.29             | 21  | 48   | 1.29             | 32  | 5    | 1.29             | 43  | 30   | 3.36             |     |      |                  |
| 11  | 44   | 1.29             | 22  | 49   | 1.29             | 33  | 22   | 1.64             | 44  | 21   | 3.36             |     |      |                  |
