# Supplementary material for: Tetraalkylammonium oleate and linoleate based ionic liquids: promising extractants for metal salts
Source: Royal Society of Chemistry journal article supplement (doi:10.1039/c2gc36458a), 2012-11-01
Supplement: c2gc36458a_5.pdf [file c2gc36458a_5.pdf]

This report was created by ACD/NMR Processor Academic Edition. For more information go to [www.acdlabs.com/nmrproc/](http://www.acdlabs.com/nmrproc/)

1/18/2012 10:03:09 AM

|                                                                 |                                        |
|-----------------------------------------------------------------|----------------------------------------|
| <b>Formula</b> C <sub>50</sub> H <sub>101</sub> NO <sub>2</sub> | <b>FW</b> 748.3424 (281.4540+466.8885) |
|-----------------------------------------------------------------|----------------------------------------|

|                                                                      |                                      |                                 |                                      |
|----------------------------------------------------------------------|--------------------------------------|---------------------------------|--------------------------------------|
| <b>Acquisition Time (sec)</b> 1.9980                                 | <b>Comment</b> Std Proton parameters | <b>Date</b> Jan 16 2012         | <b>Date Stamp</b> Jan 16 2012        |
| <b>File Name</b> \\wetsus04\users\:\dpar\Project\NMR\DPAR027.fid\fid | <b>Frequency (MHz)</b> 400.16        | <b>Nucleus</b> 1H               | <b>Number of Transients</b> 16       |
| <b>Original Points Count</b> 12791                                   | <b>Points Count</b> 16384            | <b>Pulse Sequence</b> s2pul     | <b>Receiver Gain</b> 12.00           |
| <b>Spectrum Offset (Hz)</b> 2400.9629                                | <b>Spectrum Type</b> STANDARD        | <b>Sweep Width (Hz)</b> 6402.05 | <b>Temperature (degree C)</b> 25.000 |
|                                                                      |                                      |                                 | <b>Solvent</b> CHLOROFORM-d          |

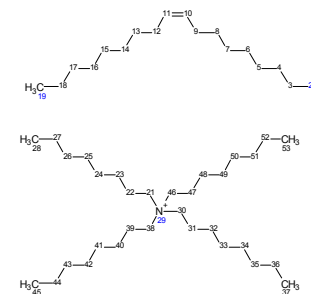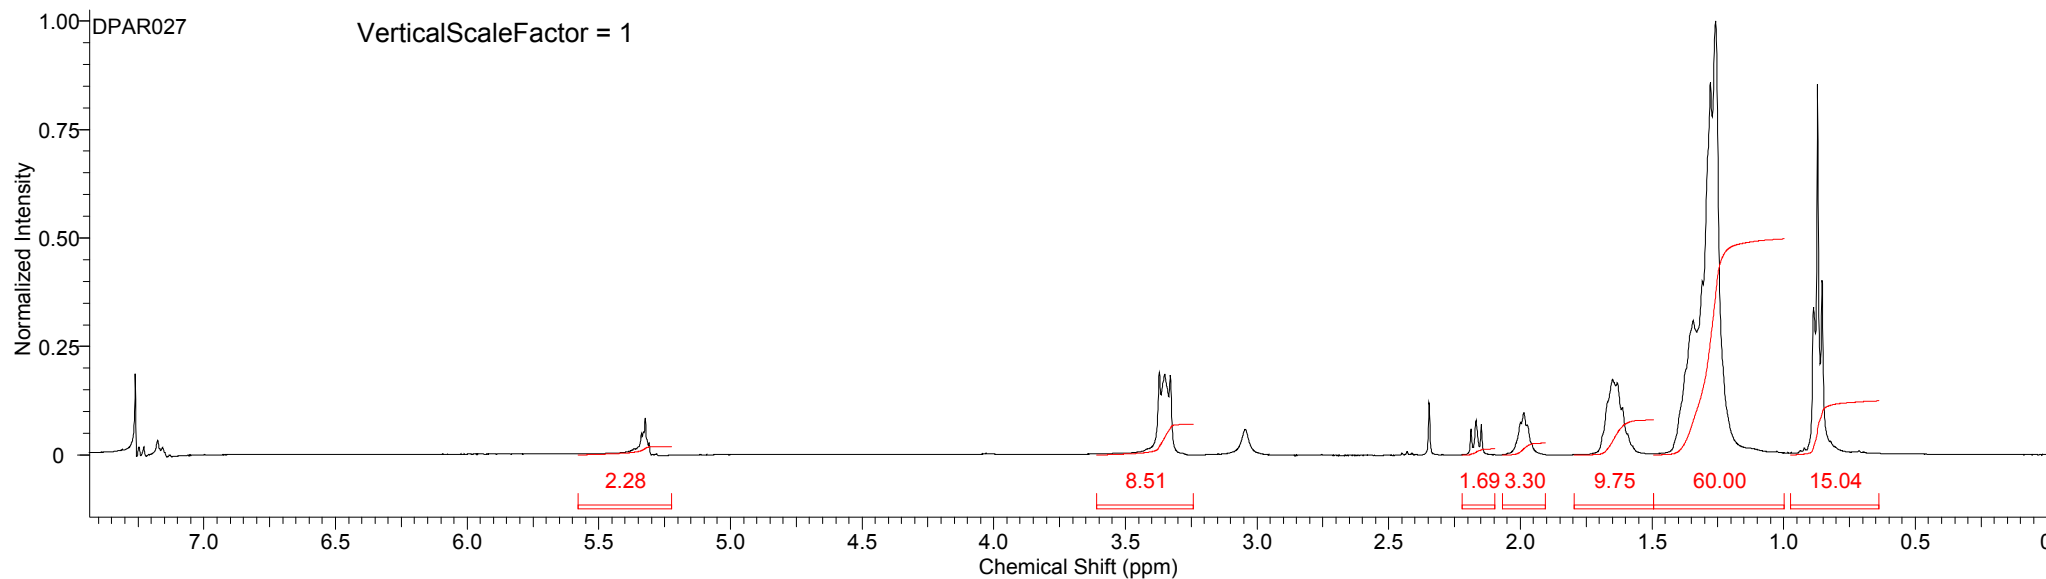

**This report was created by ACD/NMR Processor Academic Edition. For more information go to [www.acdlabs.com/nmrproc/](http://www.acdlabs.com/nmrproc/)**

| No. | Atom | Exp. Shift (ppm) |
|-----|------|------------------|-----|------|------------------|-----|------|------------------|-----|------|------------------|-----|------|------------------|
| 1   | 28   | 0.87             | 11  | 8    | 1.26             | 21  | 26   | 1.26             | 31  | 35   | 1.26             | 41  | 12   | 1.99             |
| 2   | 45   | 0.87             | 12  | 7    | 1.26             | 22  | 25   | 1.26             | 32  | 34   | 1.26             | 42  | 3    | 2.17             |
| 3   | 37   | 0.87             | 13  | 6    | 1.26             | 23  | 24   | 1.26             | 33  | 33   | 1.26             | 43  | 38   | 3.35             |
| 4   | 53   | 0.87             | 14  | 5    | 1.26             | 24  | 23   | 1.26             | 34  | 32   | 1.26             | 44  | 21   | 3.35             |
| 5   | 18   | 1.26             | 15  | 44   | 1.26             | 25  | 52   | 1.26             | 35  | 4    | 1.65             | 45  | 46   | 3.35             |
| 6   | 17   | 1.26             | 16  | 43   | 1.26             | 26  | 51   | 1.26             | 36  | 22   | 1.65             | 46  | 30   | 3.35             |
| 7   | 16   | 1.26             | 17  | 42   | 1.26             | 27  | 50   | 1.26             | 37  | 39   | 1.65             | 47  | 10   | 5.32             |
| 8   | 15   | 1.26             | 18  | 41   | 1.26             | 28  | 49   | 1.26             | 38  | 31   | 1.65             | 48  | 11   | 5.32             |
| 9   | 14   | 1.26             | 19  | 40   | 1.26             | 29  | 48   | 1.26             | 39  | 47   | 1.65             |     |      |                  |
| 10  | 13   | 1.26             | 20  | 27   | 1.26             | 30  | 36   | 1.26             | 40  | 9    | 1.99             |     |      |                  |

| No. | (ppm) | (Hz)   | Height |
|-----|-------|--------|--------|
| 1   | 0.82  | 329.3  | 0.0325 |
| 2   | 0.85  | 341.8  | 0.4022 |
| 3   | 0.87  | 348.8  | 0.8541 |
| 4   | 0.89  | 354.7  | 0.3409 |
| 5   | 1.26  | 503.6  | 1.0000 |
| 6   | 1.28  | 511.4  | 0.8587 |
| 7   | 1.31  | 523.5  | 0.4012 |
| 8   | 1.34  | 537.6  | 0.3094 |
| 9   | 1.61  | 645.0  | 0.1086 |
| 10  | 1.63  | 652.8  | 0.1662 |
| 11  | 1.65  | 659.9  | 0.1734 |
| 12  | 1.97  | 790.0  | 0.0699 |
| 13  | 1.99  | 795.1  | 0.0970 |
| 14  | 2.00  | 800.2  | 0.0749 |
| 15  | 2.15  | 859.6  | 0.0710 |
| 16  | 2.17  | 867.8  | 0.0793 |
| 17  | 2.19  | 875.2  | 0.0601 |
| 18  | 2.35  | 938.9  | 0.1205 |
| 19  | 3.04  | 1218.3 | 0.0590 |
| 20  | 3.33  | 1332.4 | 0.1840 |
| 21  | 3.35  | 1341.0 | 0.1863 |
| 22  | 3.37  | 1349.2 | 0.1907 |
| 23  | 5.31  | 2124.5 | 0.0275 |
| 24  | 5.32  | 2130.4 | 0.0852 |
| 25  | 5.33  | 2133.1 | 0.0529 |
| 26  | 5.34  | 2135.8 | 0.0494 |
| 27  | 7.18  | 2871.3 | 0.0344 |
| 28  | 7.26  | 2905.3 | 0.1875 |
